# Supplementary material for: Bioluminescent Ratiometric Indicator for Analysis of Water Hardness in Household Water
Source: PubMed Central journal article supplement (PMC7308811; doi:10.3390/s20113164), 2020-06-02
Supplement: sensors-20-03164-s001.pdf [file sensors-20-03164-s001.pdf]

Supporting information

# Bioluminescent Ratiometric Indicator for Analysis of Water Hardness in Household Water

Md Nadim Hossain <sup>1,2</sup>, Ryuichi Ishida <sup>1</sup>, Mitsuru Hattori <sup>1,2</sup>, Tomoki Matsuda <sup>1,2</sup> and Takeharu Nagai <sup>1,2,\*</sup>

<sup>1</sup> The Institute of Scientific and Industrial Research (SANKEN), Osaka University, 8-1 Mihogaoka, Ibaraki 567-0047, Japan; nd6@sanken.osaka-u.ac.jp (M.N.H.); i.doradoradora1@gmail.com (R.I.); 8tr@sanken.osaka-u.ac.jp (M.H.); tmatsuda@sanken.osaka-u.ac.jp (T.M.)

<sup>2</sup> Department of Biotechnology, Graduate School of Engineering, Osaka University, 2-1 Yamadaoka, Suita 565-0871, Japan

\* Correspondence: ng1@sanken.osaka-u.ac.jp

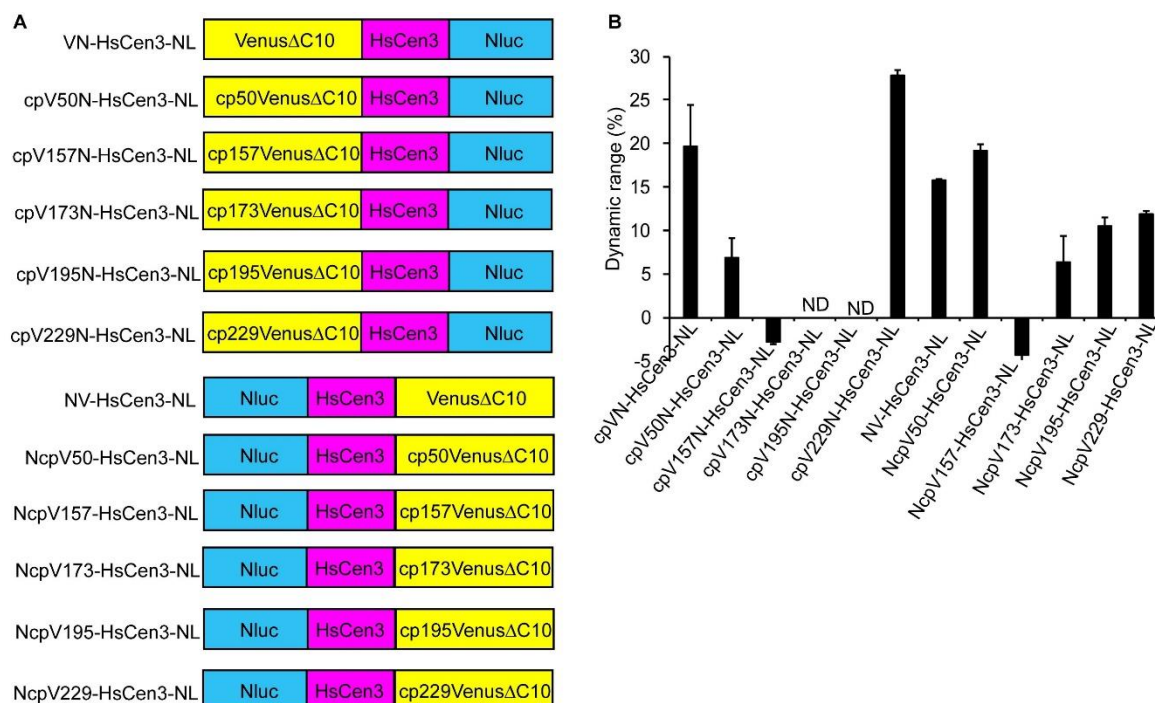

**Figure S1.** Construction and screening of LOTUS-W candidates (A) Domain structures of the LOTUS-W candidates. Venus or cpVenus (cp50, 157, 173, 195, or 229) was connected to the N-terminal or C-terminal of HsCen3. Nluc was connected to the other side. (B) Dynamic range for Mg<sup>2+</sup> in candidates calculated in the presence and absence of 10 mM Mg<sup>2+</sup> emission ratio (525 nm/455 nm). Each dynamic range is shown as a percentage (%).

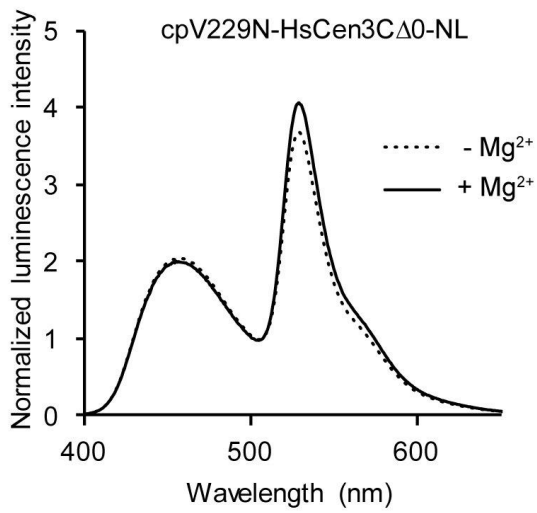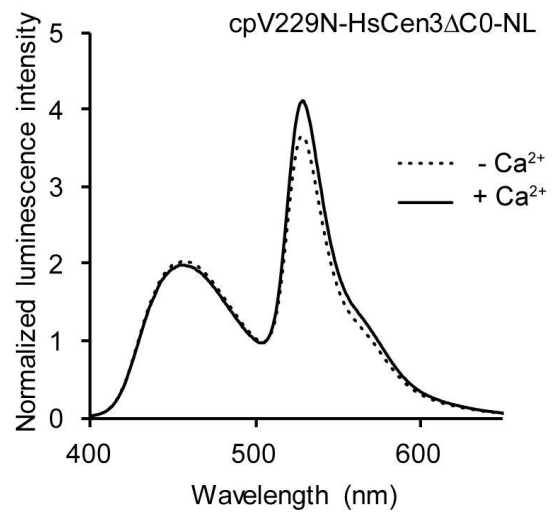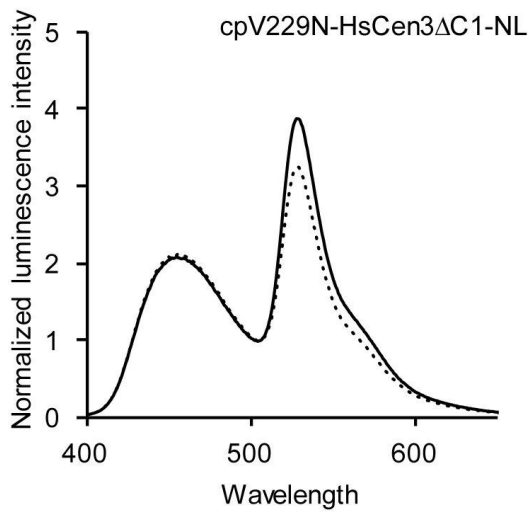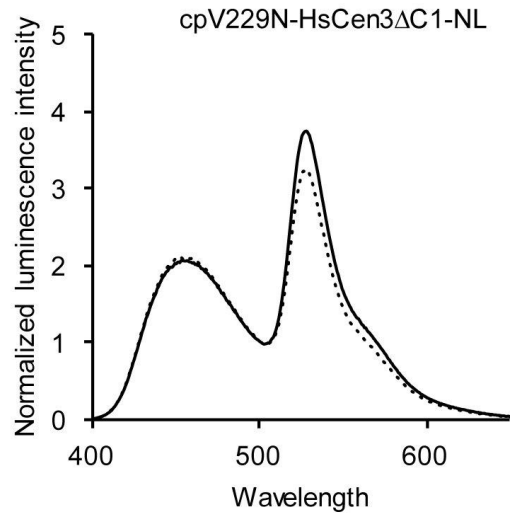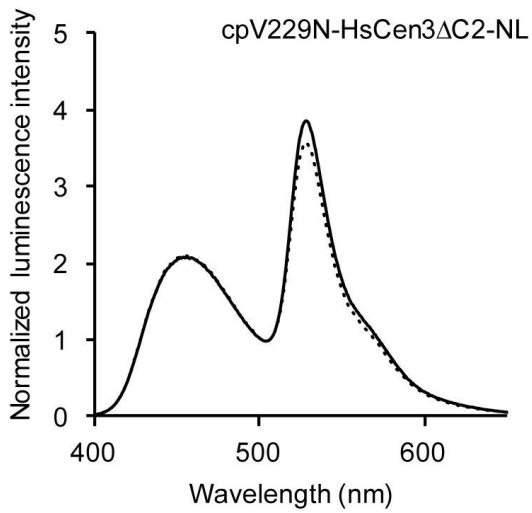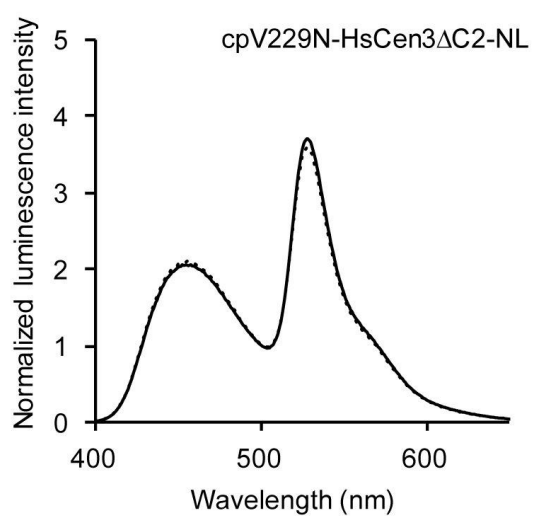

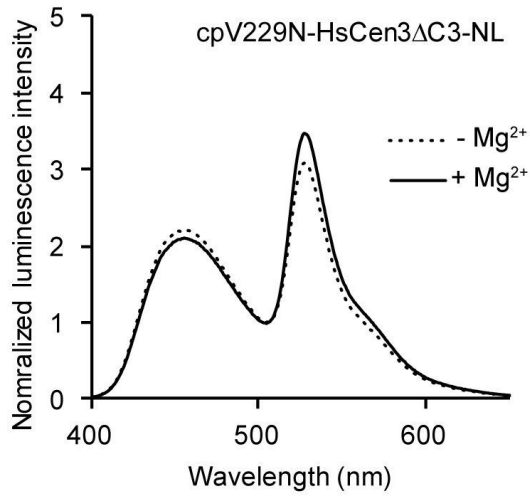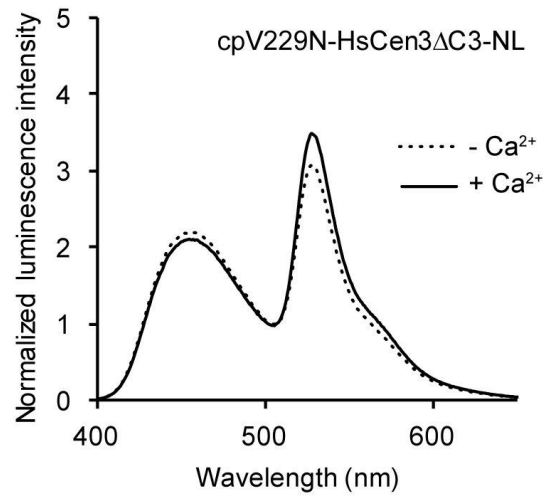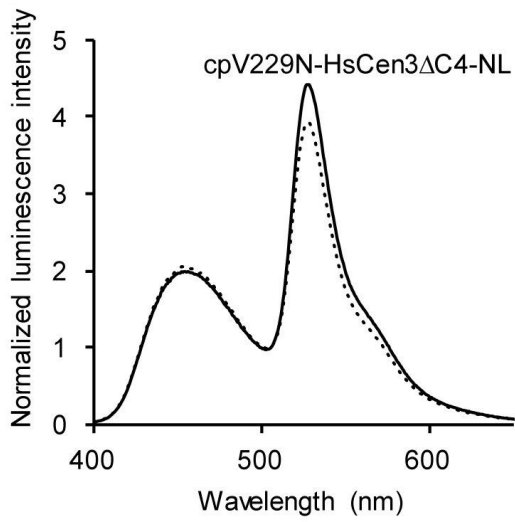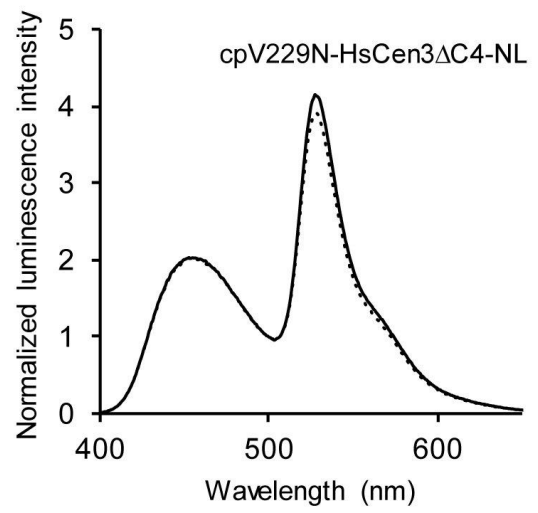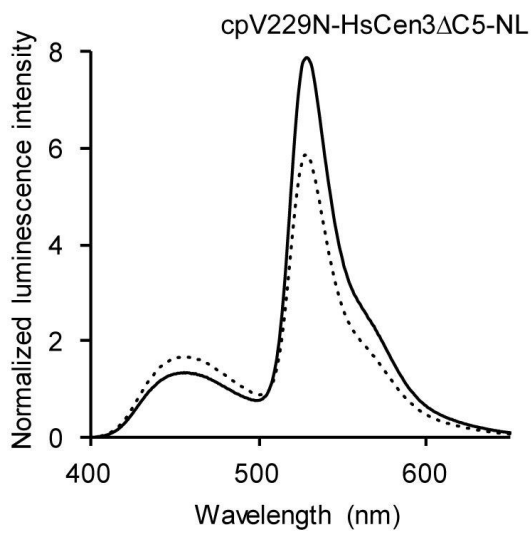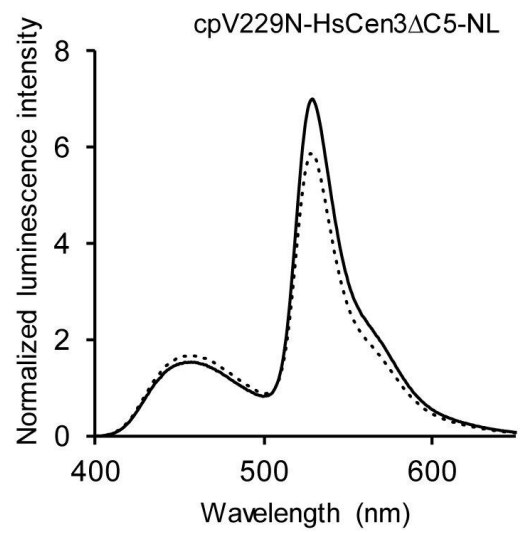

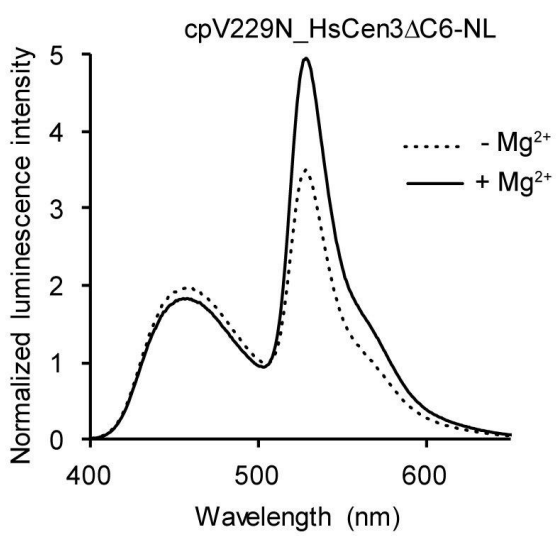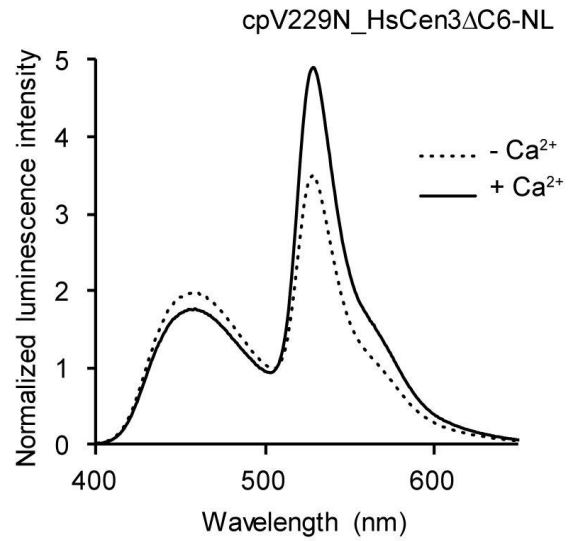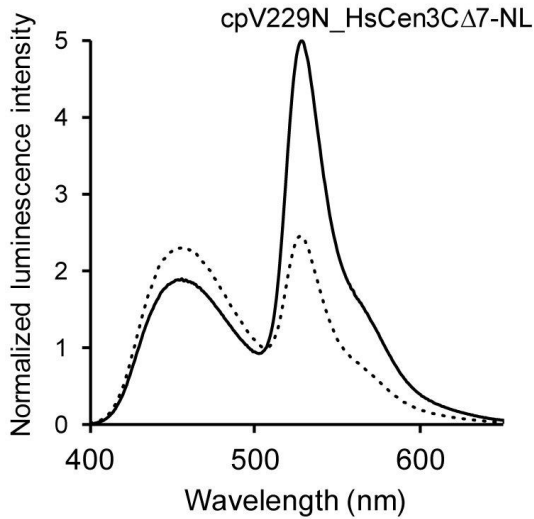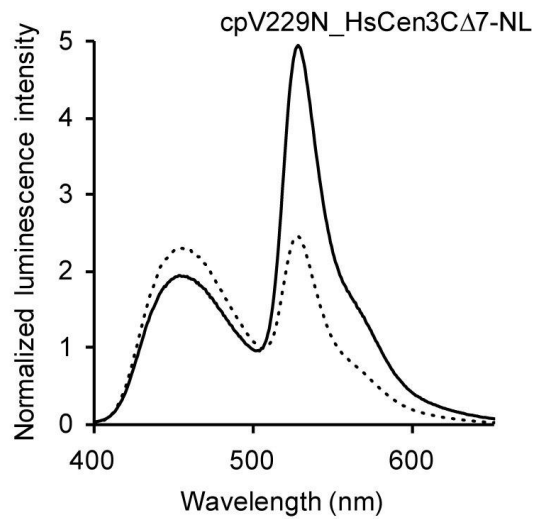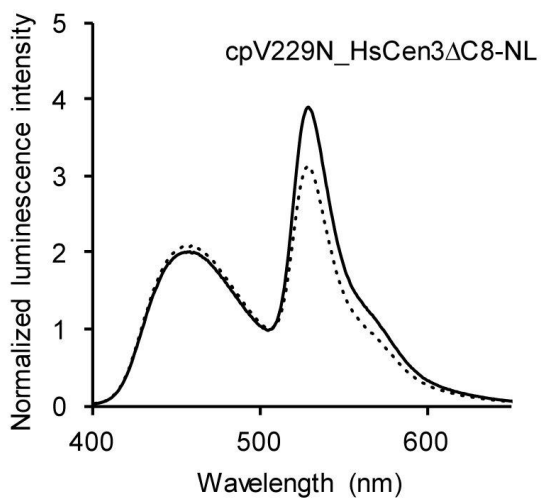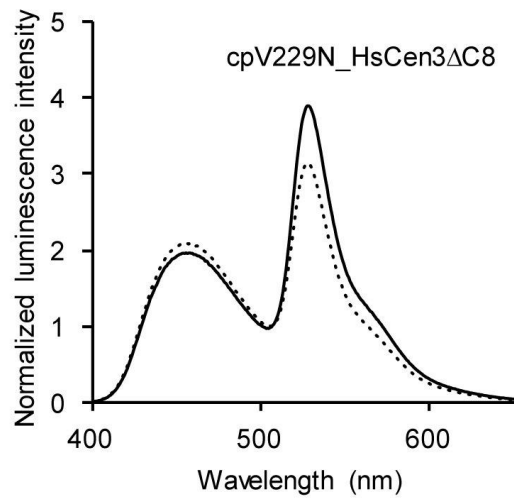

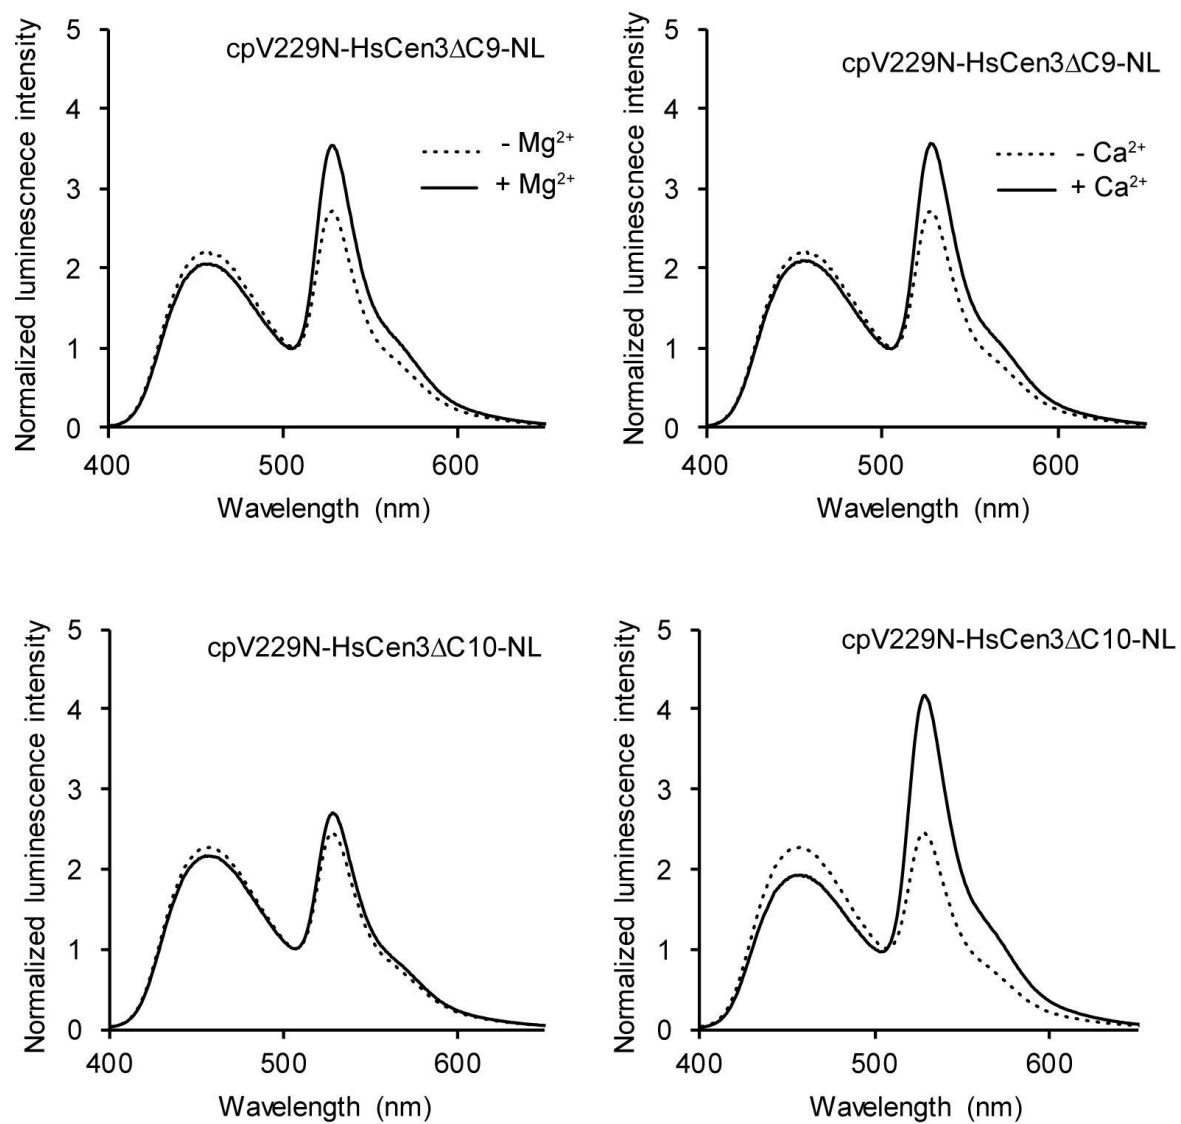

**Figure S2.** *In vitro* properties of cpV229N-HsCen3-NL variants. Bioluminescence spectra of cpV229N-HsCen3-N3 variants are shown in the presence (solid line) or absence (dotted line) of 10 mM Mg<sup>2+</sup> or Ca<sup>2+</sup>.

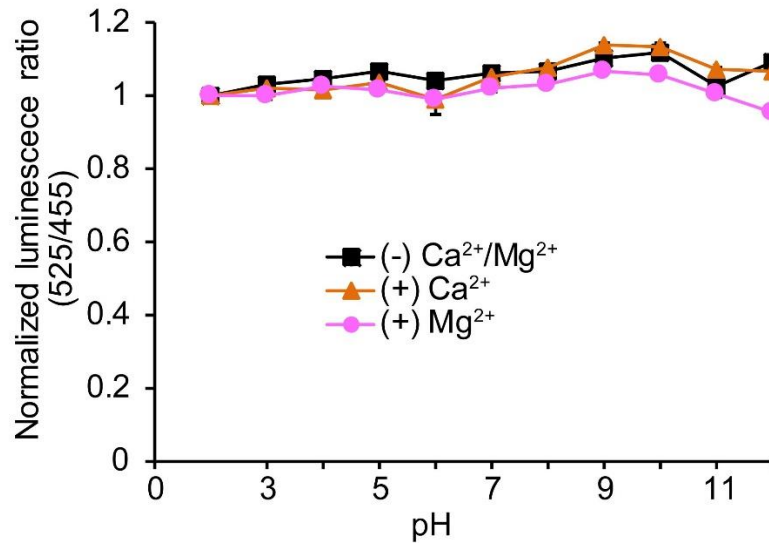

**Figure S3.** pH dependence of cpV229N\_HsCen3ΔC7-NL. Bioluminescence intensity ratios of cpV229N\_HsCen3ΔC7-NL were confirmed at different pH values. These counts were measured in the presence and absence of 10 mM Ca<sup>2+</sup> or 10 mM Mg<sup>2+</sup>. All measurements were performed three times (n = 3).

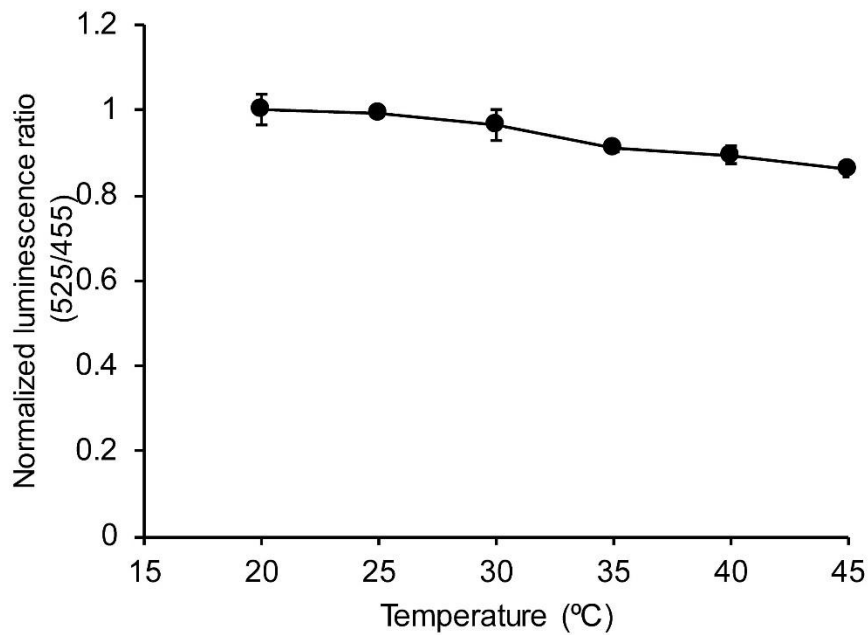

**Figure S4.** Temperature dependence of cpV229N\_HsCen3ΔC7-NL. Bioluminescence intensity ratio at different temperatures.

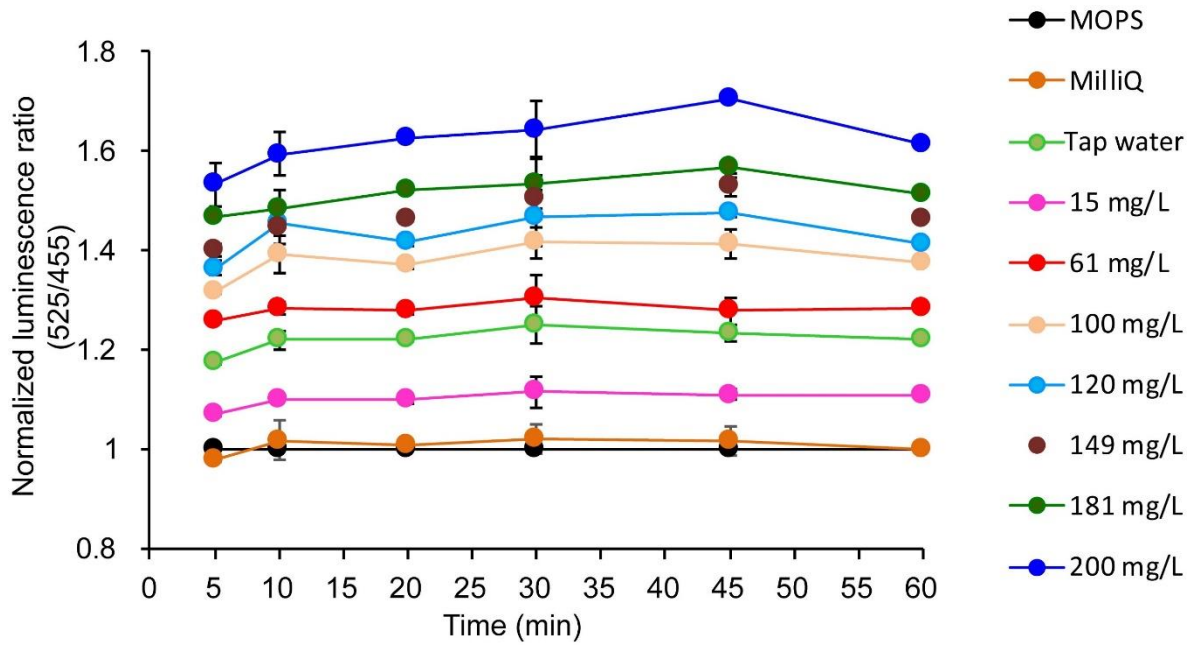

**Figure S5.** Time course variation of the LOTUS-W ratio. Bioluminescence intensities of LOTUS-W were measured at each time point with different water hardness (CaCO<sub>3</sub>) conditions and the ratio was calculated (525 nm/455 nm). All ratios were normalized to 10 mM MOPS without added ions.

**Table S1.** Oligonucleotide sequence.

| Name               | Sequence (5'--3')                    |
|--------------------|--------------------------------------|
| F-BH1-Venus_1      | GCGGATCCGATG GTGAGCAAGGGCGAG         |
| F-BH1-M-ven_50     | AAGGATCCGATGACCGGCAAGCTGCCC          |
| F-BH1-M-ven_157    | AAGGATCCGAGCAGAAGAACGGCATC           |
| F-BH1-M-ven_173    | AAGGATCCGATGGACGGCGGCGTGC            |
| F-BH1-M-ven_195    | TTGGATCCGATGCTGCCCGACAACCAC          |
| F-BH1-M-ven_229    | AAGGATCCGATGATCACTCTCGGCATG          |
| R-ven_49-SphI      | ATTGCATGCGGGTGCAGATCAGCTTCAGGG       |
| R-ven_156-SphI     | GACGCATGCGCTTGTTCGGCGGTGATATAGA      |
| R-ven_172-SphI     | ATTGCATGCGCTCGATGTTGTGGCGGATCT       |
| R-ven_194-SphI     | ATTGCATGCGCAGCACGGGGCCGTCGCCGA       |
| R-ven_228-SphI     | TATGCATGCGCCCCGGCGGCGGTCACGAACT      |
| F-SacI-gfp_1       | TTTGAGCTCATGGTGTGAGCAAGGGCGAGGA      |
| F-SacI-M-ven_50    | AATGAGCTCATGACCGGCAAGCTGCCCGTGCCC    |
| F-SacI-M-ven_157   | AATGAGCTCATGCAGAAGAACGGCATCAAGGCCAAC |
| F-SacI-M-ven_173   | AATGAGCTCATGGACGGCGGCGTGCAGCTCGCC    |
| F-SacI-M-ven_195   | AATGAGCTCATGCTGCCCGACAACCCTACCTGAGC  |
| F-SacI-M-ven_229   | TTTGAGCTCATGATCACTCTCGGCATGGA        |
| R-ven_49-x-EcoRI   | ATTGAATTCTTAGGTGCAGATCAGCTTCAG       |
| R-ven_156-x-EcoRI  | ATTGAATTCTTACTTGTTCGGCGGTGATATA      |
| R_ven_172-x-EcoRI  | ATTGAATTCTTACGATGTTGTGGCGGATCT       |
| R-ven_195-x-EcoRI  | ATTGAATTCTTACAGCACGGGGCCGTCGCC       |
| R-ven_229-x-EcoRI  | ATTGAATTCTTACCCGGCGGCGGTCACGAA       |
| R-cp229Venus-Sph1  | ATAGCATGCCCCGGCGGCGGTCACGAA          |
| R-Nluc-171-X-ER1   | TATGAATTCTTACGCCAGAATGCGTTCGC        |
| R-Nluc-171-g-SphI  | ATTGCATGCGCGCCAGAATGCGTTCGCACA       |
| R-BH1-g-Nluc       | AATGGATCCGATGGTCTTCACACTCGAAG        |
| F-SacI_Nanoluc     | ATCGAGCTCGATGGTCTTCACACTCGA          |
| R_SacI_hsCen3-ΔC1  | TGGGAGCTCATCTCTTTCCAATATCCAGTCTG     |
| R_SacI_hsCen3-ΔC2  | TGGGAGCTCTCTTTCCAATATCCAGTCTGTC      |
| R_SacI_hsCen3-ΔC3  | TGGGAGCTCTTCCAATATCCAGTCTGTAC        |
| R_SacI_hsCen3-ΔC4  | TGGGAGCTCCAATATCCAGTCTGTCACAAC       |
| R_SacI_hsCen3-ΔC5  | TGGGAGCTCTATCCAGTCTGTCACAACCTC       |
| R_SacI_hsCen3-ΔC6  | TGGGAGCTCCCAGTCTGTCACAACCTTCATT      |
| R_SacI_hsCen3-ΔC7  | TGGGAGCTCCCAGTCTGTCACAACCTTCATT      |
| R_SacI_hsCen3-ΔC8  | TGGGAGCTCTGTCACAACCTTCATTAAAATCTTCA  |
| R_SacI_hsCen3-ΔC9  | TGGGAGCTCCACAACCTTCATTAAAATCTTCAAAGG |
| R_SacI_hsCen3-ΔC10 | TGGGAGCTCAACTTCATTAAAATCTTCAAAGGTGA  |



**Table S2.** WHO/USGS-proposed water hardness scale based on CaCO<sub>3</sub>.

| Scale of WH (mg/L) | Classification  |
|--------------------|-----------------|
| 0–60               | Soft            |
| 61–120             | Moderately hard |
| 121–180            | Hard            |
| 181<               | Very hard       |

**Table S3.** Water hardness of commercially available mineral water.

| Product name             | Scale of WH (mg/L) | Classification | Mg <sup>2+</sup> (mg/L) | Ca <sup>2+</sup> (mg/L) | Other minerals                                                                  | pH  | Company name, Country             |
|--------------------------|--------------------|----------------|-------------------------|-------------------------|---------------------------------------------------------------------------------|-----|-----------------------------------|
| Natural Mineral Water    | 10                 | Soft           | 0.5                     | 3                       | —                                                                               | 6.4 | AEON CO., LTD., Japan             |
| Okudaisan no Tennensui   | 20                 | Soft           | 1~3                     | 2~7                     | Na <sup>+</sup> , K <sup>+</sup>                                                | 7   | Suntory Holdings Limited, Japan   |
| Minami-Alps no Tennensui | 30                 | Soft           | 1~3                     | 6~15                    | Na <sup>+</sup> , K <sup>+</sup>                                                | 7   | Suntory Holdings Limited, Japan   |
| CRYSTAL Geyser           | 38                 | Soft           | 3.4                     | 6.4                     | Na <sup>+</sup> , K <sup>+</sup>                                                | —   | Crystal Geyser Water Company, USA |
| Irohasu                  | 40                 | Soft           | 5.5                     | 7.1                     | Na <sup>+</sup> , K <sup>+</sup>                                                | 7   | The Coca-Cola Company, Japan      |
| Volvic                   | 60                 | Soft           | 8                       | 10.15                   | Na <sup>+</sup> , K <sup>+</sup>                                                | 7   | Danone S.A., France               |
| Ogeu                     | 172                | Hard           | 10.2                    | 40.6                    | K <sup>+</sup>                                                                  | —   | Coron Vert CO., LTD., France      |
| Beaupre                  | 240                | Very hard      | 20.4                    | 50.8                    | —                                                                               | —   | CMA CGM, France                   |
| Evian                    | 304                | Very hard      | 20.6                    | 80                      | Na <sup>+</sup>                                                                 | 7.2 | Danone S.A., France               |
| Vittle                   | 315                | Very hard      | 20                      | 90.4                    | —                                                                               | —   | Nestlé S.A., France               |
| Perlage                  | 389                | Very hard      | 20.4                    | 110.7                   | K <sup>+</sup>                                                                  | 5.3 | Nałęczów Zdrój Sp. z o.o, Poland  |
| S.Pellegrino             | 610                | Very hard      | 40.9                    | 160.4                   | So <sub>4</sub> <sup>2-</sup> , HCO <sub>3</sub> <sup>-</sup> , Cl <sup>-</sup> | —   | Sanpellegrino S.p.A, Italy        |
| Gerolsteiner             | 1310               | Very hard      | 100                     | 360                     | Na <sup>+</sup> , K <sup>+</sup>                                                | 6.4 | GmbH & Co. KG, Germany            |
| Contrex                  | 1468               | Very hard      | 70.45                   | 460.8                   | K <sup>+</sup>                                                                  | —   | Nestlé S.A., France               |

**Table S4.** *in vitro* properties of cpV229N\_HsCen3-NL variants.

| Variants name       | $R_{\min}$ for $Mg^{2+}/Ca^{2+}$ | $R_{\max}$ for $Mg^{2+}$ | $R_{\max}$ for $Ca^{2+}$ | Dynamic range for $Mg^{2+}$ (%) | Dynamic range for $Ca^{2+}$ (%) |
|---------------------|----------------------------------|--------------------------|--------------------------|---------------------------------|---------------------------------|
| cpV229N_Cen3-NL     | 1.8                              | 2                        | 2                        | 13                              | 15                              |
| cpV229N_Cen3ΔC1-NL  | 1.5                              | 1.9                      | 1.8                      | 23                              | 18                              |
| cpV229N_Cen3ΔC2-NL  | 1.7                              | 1.9                      | 1.8                      | 9                               | 6                               |
| cpV229N_Cen3ΔC3-NL  | 1.3                              | 1.6                      | 1.7                      | 18                              | 18                              |
| cpV229N_Cen3ΔC4-NL  | 1.9                              | 2.2                      | 2                        | 15                              | 5                               |
| cpV229N_Cen3ΔC5-NL  | 3.4                              | 5.8                      | 4.5                      | 66                              | 30                              |
| cpV229N_Cen3ΔC6-NL  | 1.7                              | 2.7                      | 2.8                      | 52                              | 56                              |
| cpV229N_Cen3ΔC7-NL  | 1                                | 2.6                      | 2.6                      | 145                             | 140                             |
| cpV229N_Cen3ΔC8-NL  | 1.5                              | 1.9                      | 2                        | 29                              | 31                              |
| cpV229N_Cen3ΔC9-NL  | 1.2                              | 1.7                      | 1.7                      | 40                              | 38                              |
| cpV229N_Cen3ΔC10-NL | 1                                | 1.2                      | 2.2                      | 16                              | 101                             |
